# Supplementary material for: Pain tolerance predicts human social network size
Source: PubMed Central journal article supplement (PMC4848525; doi:10.1038/srep25267), 2016-04-28
Supplement: srep25267-s1.pdf [file srep25267-s1.pdf]

## **Supplementary Information**

### **Pain tolerance predicts human social network size**

**Katerina V.-A. Johnson<sup>1,\*</sup> and Robin I. M. Dunbar<sup>1</sup>**

<sup>1</sup>University of Oxford, Department of Experimental Psychology, South Parks Road, Oxford, OX1 3UD

\*katerina.johnson@pmb.ox.ac.uk

**Supplementary Table S1. Regression statistics for predictors of social network size.**

| Predictor      | Estimate $\pm$ SE  | <i>t</i> value | <i>P</i> value | $\Delta R^2$ |
|----------------|--------------------|----------------|----------------|--------------|
| Pain tolerance | 0.255 $\pm$ 0.096  | 2.645          | 0.010*         | 0.066        |
| Fitness        | -0.048 $\pm$ 0.025 | -1.940         | 0.055          | 0.035        |
| Stress         | -0.027 $\pm$ 0.022 | -1.226         | 0.223          | 0.014        |
| Agreeableness  | 0.016 $\pm$ 0.008  | 2.013          | 0.047*         | 0.038        |

Total  $R^2 = 0.101$

**Supplementary Table S2. Regression statistics for predictors of inner social network size.**

| Predictor      | Estimate $\pm$ SE  | <i>t</i> value | <i>P</i> value | $\Delta R^2$ |
|----------------|--------------------|----------------|----------------|--------------|
| Pain tolerance | 0.091 $\pm$ 0.084  | 1.080          | 0.283          | 0.012        |
| Fitness        | -0.008 $\pm$ 0.022 | -0.381         | 0.704          | 0.002        |
| Stress         | -0.003 $\pm$ 0.019 | -0.146         | 0.884          | <0.001       |
| Agreeableness  | 0.009 $\pm$ 0.007  | 1.318          | 0.191          | 0.018        |

Total  $R^2 = 0.026$

**Supplementary Table S3. Regression statistics for predictors of outer social network size.**

| Predictor      | Estimate $\pm$ SE  | <i>t</i> value | <i>P</i> value | $\Delta R^2$ |
|----------------|--------------------|----------------|----------------|--------------|
| Pain tolerance | 3.844 $\pm$ 1.189  | 3.232          | 0.002*         | 0.093        |
| Fitness        | -0.721 $\pm$ 0.307 | -2.349         | 0.021*         | 0.049        |
| Stress         | -0.625 $\pm$ 0.270 | -2.318         | 0.023*         | 0.048        |
| Agreeableness  | 0.210 $\pm$ 0.096  | 2.194          | 0.031*         | 0.043        |

Total  $R^2 = 0.150$

\*Denotes statistical significance at  $\alpha = 0.05$

**Supplementary Table S4. Partial correlations between variables in S1 regression model.**

|                | Total network size | Pain tolerance | Fitness | Stress |
|----------------|--------------------|----------------|---------|--------|
| Pain tolerance | 0.278*             | -              | -       | -      |
| Fitness        | -0.185             | 0.350*         | -       | -      |
| Stress         | -0.185             | 0.164          | -0.287* | -      |
| Agreeableness  | 0.202*             | -0.216*        | 0.169   | 0.208* |

**Supplementary Table S5. Partial correlations between variables in S2 regression model.**

|                | Inner network size | Pain tolerance | Fitness | Stress |
|----------------|--------------------|----------------|---------|--------|
| Pain tolerance | 0.115              | -              | -       | -      |
| Fitness        | -0.038             | 0.318*         | -       | -      |
| Stress         | -0.041             | 0.124          | -0.263* | -      |
| Agreeableness  | 0.098              | -0.179         | 0.140   | 0.181  |

**Supplementary Table S6. Partial correlations between variables in S3 regression model.**

|                | Outer network size | Pain tolerance | Fitness | Stress |
|----------------|--------------------|----------------|---------|--------|
| Pain tolerance | 0.313*             | -              | -       | -      |
| Fitness        | -0.233*            | 0.365*         | -       | -      |
| Stress         | -0.230*            | 0.183          | -0.302* | -      |
| Agreeableness  | 0.219*             | -0.226*        | 0.181   | 0.219* |

**Supplementary Table S7. Variance inflation factors (VIF) confirming absence of multicollinearity between predictors.**

| Predictor | Pain tolerance | Fitness | Stress | Agreeableness |
|-----------|----------------|---------|--------|---------------|
| VIF       | 1.132          | 1.181   | 1.098  | 1.060         |

\*Denotes statistical significance at  $\alpha = 0.05$
